# Supplementary material for: Photochemical induced formed Au nanomaterial with size and shape controlled by luminol–pepsin chemiluminescence reaction
Source: Royal Society of Chemistry journal article supplement (doi:10.1039/c4ra07283a), 2014-01-01
Supplement: c4ra07283a1.pdf [file c4ra07283a1.pdf]

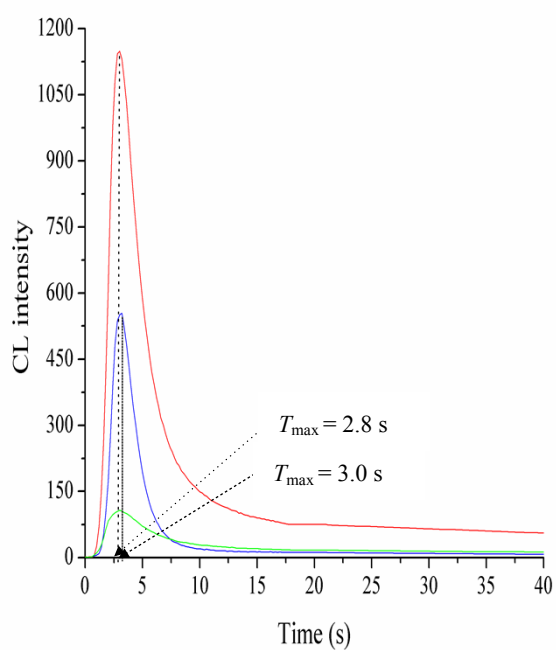

Support Fig. 1 The kinetic curve for different CL reaction.  
Curve 1: luminol-Pep; Curve 2: luminol-HAuCl<sub>4</sub>; Curve 3:  
luminol-HAuCl<sub>4</sub>-Pep. The corresponding concentrations of  
luminol, HAuCl<sub>4</sub> and Pep were  $2.5 \times 10^{-4}$ ,  $2.5 \times 10^{-5}$  and  
 $1.0 \times 10^{-6}$  mol·L<sup>-1</sup>, respectively.

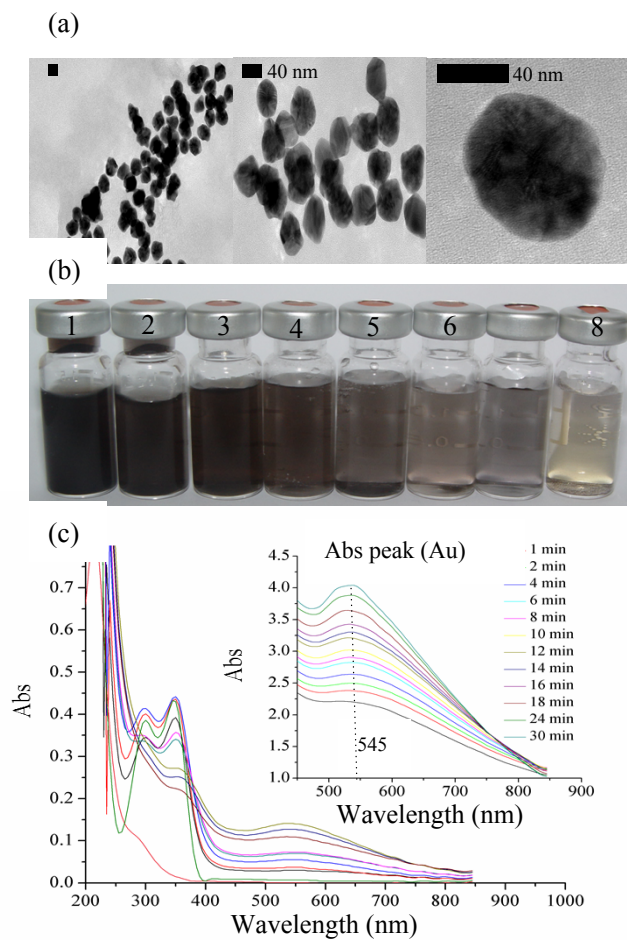

Support Fig. 2 (a) The TEM of AuNPs in luminol-HAuCl<sub>4</sub> reaction at pH from 10.0 to 14.0. The corresponding concentrations of HAuCl<sub>4</sub> and luminol were  $1.0 \times 10^{-5}$  and  $2.5 \times 10^{-4}$  M, (b) The different color of AuNMs produced with different pH from 14.0 to 9.0 (1-8) in 30 min; (c) The UV-Vis spectrum of luminol-HAuCl<sub>4</sub> (2-9) were at the different pH of 10.5, 11.0, 11.5, 12.0, 12.5, 13.0, 13.5 and 14.0, respectively (insert : The UV-Vis spectrum of luminol-HAuCl<sub>4</sub> for dynamic process at PH of 10.5).
